# Supplementary material for: Improved Diaphorina citri (Hemiptera: Liviidae) Adults Biocontrol in Citrus by Hirsutella citriformis (Hypocreales: Ophiocordycipitaceae) Gum-Enhanced Conidia Formulation
Source: MDPI journal article supplement (doi:10.3390/plants12061409), 2023-03-22
Supplement: s1 [file s1]

**Table S1. *Diaphorina citri* ADULTS median lethal time (LT<sub>50</sub>) (95% confidence limits) (days) after exposed to several formulations <sup>1</sup>**

| Formulations         |                      |                      |                      |                    |
|----------------------|----------------------|----------------------|----------------------|--------------------|
| TA                   | TGA                  | TGH                  | HGA                  | HGH                |
| 16.528 (15.72-17.38) | 17.224 (15.86-18.59) | 15.024 (13.56-16.53) | 16.391 (15.32-17.47) | 13.2 (11.37-15.03) |

<sup>1</sup> TA = absolute control, TGA = *Acacia* gum control, TGH = *Hirsutella* gum control, HGA = formulation with *Acacia* gum, HGH = formulation with *Hirsutella* gum. Based on the confidence limits, the significant lowest *Diaphorina citri* lethal time was observed by the HGH formulation exposure (Kaplan-Meier analysis).

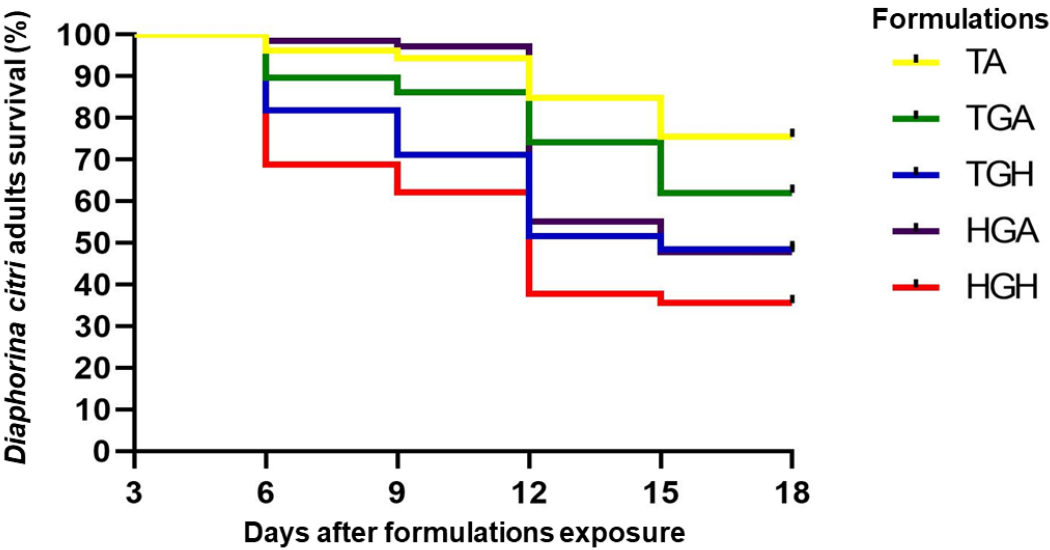

**Figure S1. *Diaphorina citri* adults' survival percentage average in laboratory bioassay after *Hirsutella citriformis* formulated conidia application by spraying. TA = absolute control, TGA = *Acacia* gum control, TGH = *Hirsutella* gum control, HGA = formulation with *Acacia* gum, HGH = formulation with *Hirsutella* gumthe *Hirsutella* gum control (TGH) presented a mortality of 57.8%. (Kaplan-Meier analysis)**
